# Supplementary material for: Humoral signatures of MOG-antibody-associated disease track with age and disease activity
Source: PubMed Central journal article supplement — Cell Rep Med. 2023 Jan 19;4(2):100913. doi: 10.1016/j.xcrm.2022.100913 (PMC9975090; doi:10.1016/j.xcrm.2022.100913), 2023-01-19
Supplement: mmc1.pdf [file mmc1.pdf]

**Cell Reports Medicine, Volume 4**

**Supplemental information**

**Humoral signatures of MOG-antibody-associated  
disease track with age and disease activity**

**Marianna Spatola, Omar Chuquisana, Wonyeong Jung, Joseph A. Lopez, Eva-Maria Wendel, Sudarshini Ramanathan, Christian W. Keller, Tim Hahn, Edgar Meinel, Markus Reindl, Russell C. Dale, Heinz Wiendl, Douglas A. Lauffenburger, Kevin Rostásy, Fabienne Brilot, Galit Alter, and Jan D. Lünemann**

## Figure S1

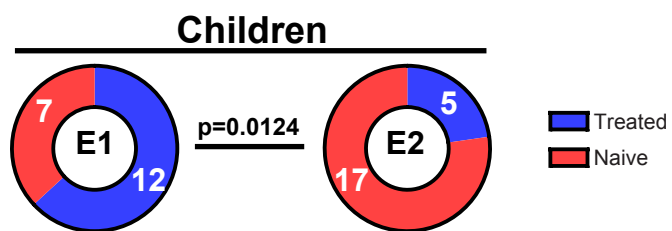

**Figure S1. Proportion of treated (blue) vs treatment-naive (red) patients with endophenotype 1 and endophenotype 2.** Patients receiving immunotherapy are not enriched in the less proinflammatory endophenotype 2. Statistical comparison: Fisher exact test. Related to Figure 2 and 3
